# Supplementary material for: Diffusion-Driven Looping Provides a Consistent Framework for Chromatin Organization
Source: PLOS journal article supplement (doi:10.1371/journal.pone.0012218), 2010-08-25

## Supplementary Figure 2

**Loop size distribution and specific contact probabilities for  $N = 128$ .** **Upper-most figure:** Shown is the size distribution  $P(\ell)$  of functional chromatin loops of model polymers with  $N = 128$  beads. Model polymers were fully equilibrated and the loop size distribution was determined for various looping probabilities  $p$  (for reasons of comparison the average number of loops per conformation is displayed by a color code) and lifetimes  $\tau$  of the functional loops. Looping lifetimes are chosen relative to the relaxation time (cf. Materials & Methods in the manuscript). Increasing the loop number results in a markedly smaller exponent, leading to a high probability for large loops. **Bottom-most figure:** The contact probability  $p_c(l)$  for two specific sites with genomic separation (contour length)  $l$  to be co-localized. Shown are the results for equilibrated model polymers with  $N = 128$  beads and various looping probabilities  $p$ . The contact probability decreases as a power-law  $l^{-\beta}$  with a biphasic behaviour, the exponent changing at about  $l \approx 15\%$  of the chromosome length. The grey line represents the self-avoiding walk. Again, the co-localization probability is strongly increasing due to diffusion-based looping.

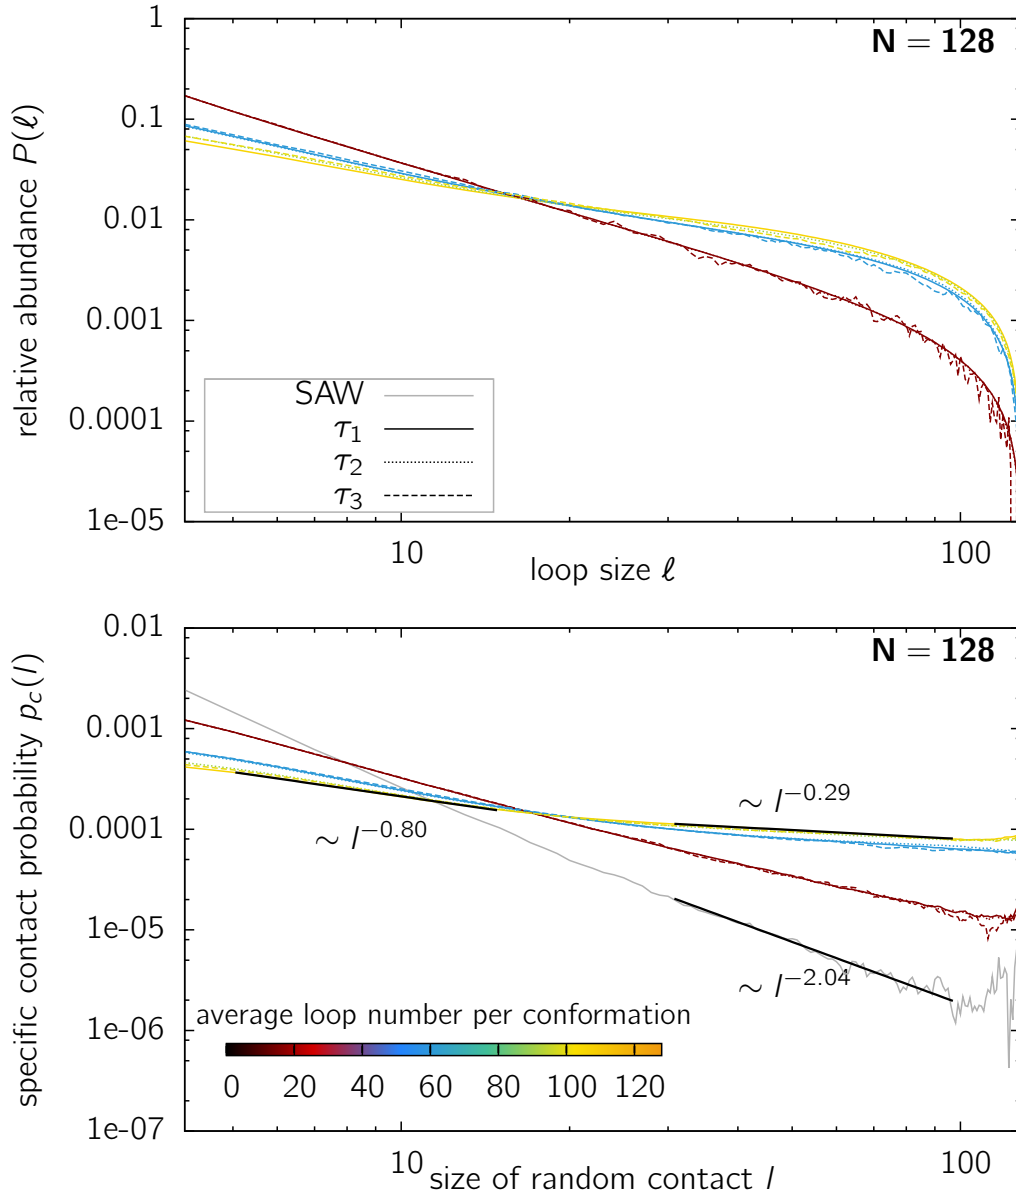

Supplement: S2 (10.1371/journal.pone.0012218.s002) [file journal.pone.0012218.s002]
